# Supplementary material for: From C,N- and N,N-chelated chloroboranes to substituted 1H-2,1-benzazaboroles and 1H-pyrrolo[1,2-c][1,3,2]diazaborolidines: a straightforward route to five-membered rings containing the B–N or N–B–N moiety
Source: Royal Society of Chemistry journal article supplement (doi:10.1039/c4dt01445f), 2014-01-01

From *C,N*- and *N,N*-chelated chloroboranes to substituted 1*H*-2,1-benzazaboroles  
and 1*H*-pyrrolo[1,2-*c*][1,3,2]diazaborolidines: A straightforward route  
to five-membered rings containing B-N or N-B-N moiety

Martin Hejda,<sup>a</sup> Antonín Lyčka,<sup>b</sup> Roman Jambor,<sup>a</sup> Aleš Růžička<sup>a</sup> and Libor Dostál<sup>\*a</sup>

<sup>a</sup> Department of General and Inorganic Chemistry, Faculty of Chemical Technology, University of Pardubice,  
Studentská 573, CZ - 532 10, Pardubice, Czech Republic

Fax: +420466037068; Tel: +420466037163; E-mail: [libor.dostal@upce.cz](mailto:libor.dostal@upce.cz)

<sup>b</sup> Research Institute for Organic Syntheses, Rybitví 296, CZ-533 54, Pardubice, Czech Republic.

## SUPPLEMENTARY INFORMATION

full assignment of NMR data of compounds **1-18**

### ***NMR spectroscopy***

<sup>1</sup>H, <sup>11</sup>B, <sup>13</sup>C and <sup>15</sup>N NMR spectra were recorded on a Bruker 500 Avance or a Bruker 400 MHz spectrometers, using a 5 mm tunable broad-band probe. Appropriate chemical shifts in <sup>1</sup>H and <sup>13</sup>C NMR spectra were related to the residual signals of the solvent (C<sub>6</sub>D<sub>6</sub>: δ(<sup>1</sup>H) = 7.16 ppm and δ(<sup>13</sup>C) = 128.39 ppm; CDCl<sub>3</sub>: δ(<sup>1</sup>H) = 7.27 ppm and δ(<sup>13</sup>C) = 77.23 ppm). <sup>11</sup>B NMR spectra were related to external standard B(OMe)<sub>3</sub> (δ(<sup>11</sup>B) = 18.1 ppm) and <sup>15</sup>N NMR spectra were related to external neat nitromethane (δ(<sup>15</sup>N) = 0.0 ppm). Deuterated solvents were dried by standard procedures. The full assignment of all signals in all measured NMR spectra was managed for all compounds with the help of various techniques including <sup>1</sup>H, <sup>13</sup>C{<sup>1</sup>H} APT, <sup>1</sup>H-<sup>1</sup>H COSY, <sup>1</sup>H-<sup>13</sup>C HMQC and <sup>1</sup>H-<sup>13</sup>C HMBC experiments. <sup>15</sup>N NMR chemical shifts were obtained from <sup>1</sup>H-<sup>15</sup>N HMBC spectra. Following NMR data includes multiplicities of signals in the <sup>1</sup>H NMR spectra. **Used abbreviations:** s = singlet, d = doublet, t = triplet, q = quartet, hep = heptet, dt = doublet of triplets, dq = doublet of quartets, td = triplet of doublets, tt = triplet of triplets, m = multiplet.

<sup>1</sup>H, <sup>11</sup>B, (<sup>13</sup>C) and <sup>15</sup>N NMR data (δ = [ppm]) in C<sub>6</sub>D<sub>6</sub> (**1**, **2**, **4-18**) or in CDCl<sub>3</sub> (**3**) at 298 K

br. = broad signal

(\*) Signal of this atom was not observed

(#) Observation of signal of the carbon atom *7a* required application of 10<sup>5</sup> pulses due to its  
broadening

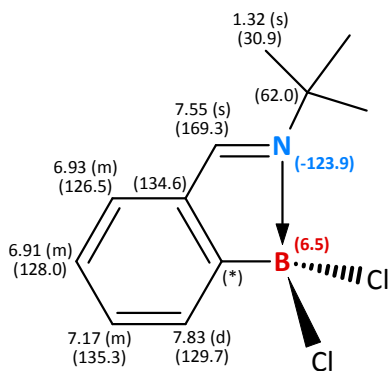

**1**

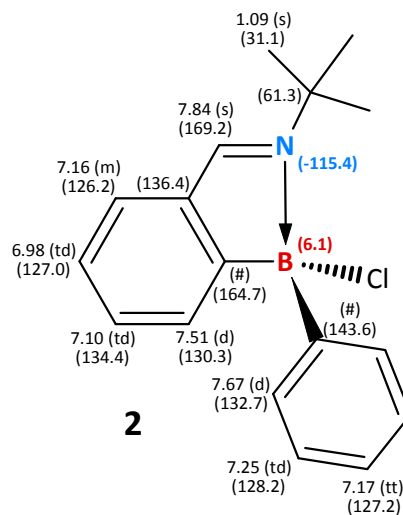

**2**

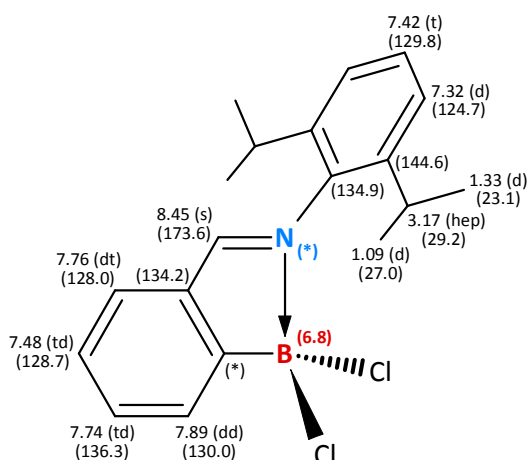

**3**

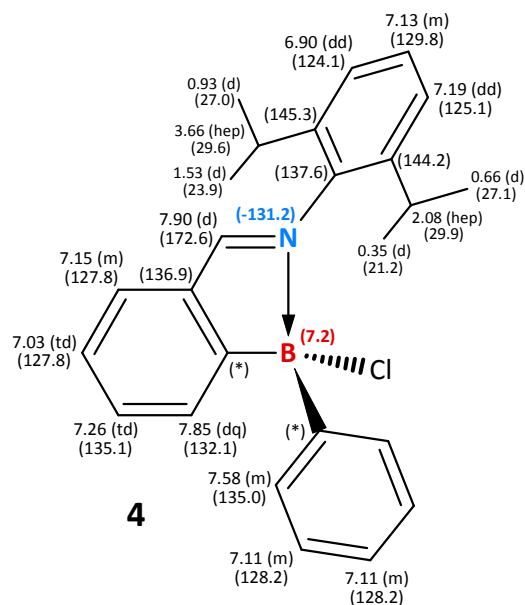

**4**

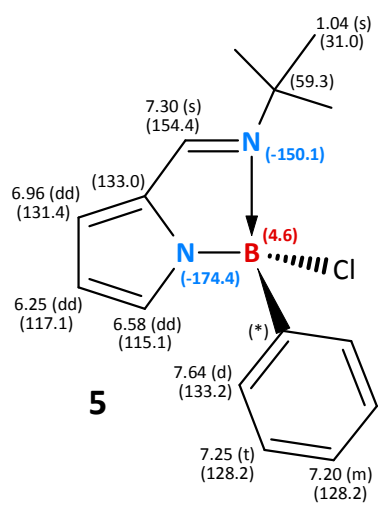

**5**

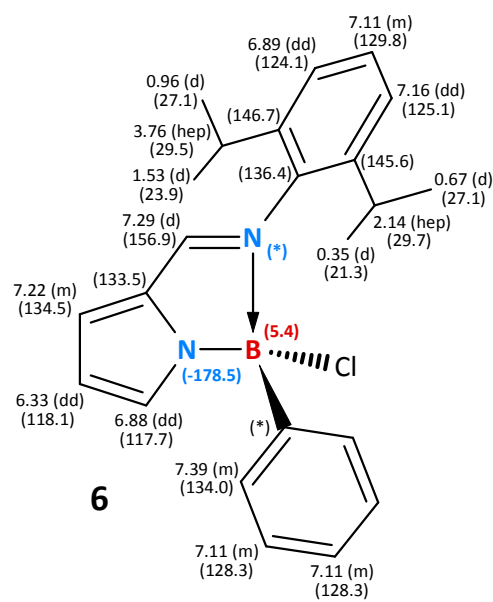

**6**

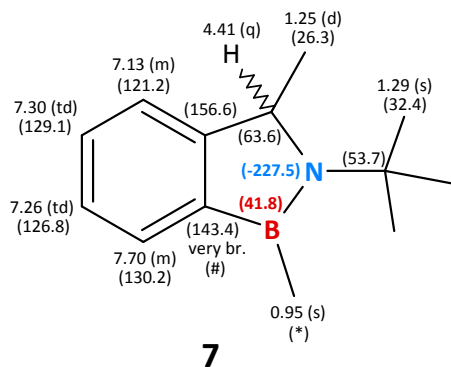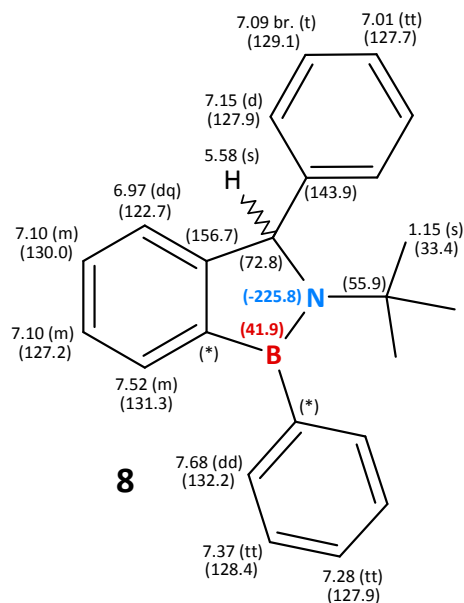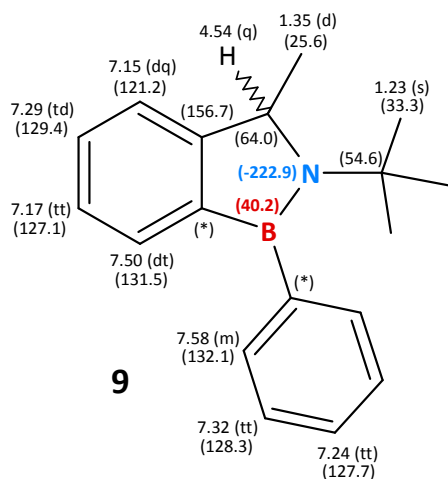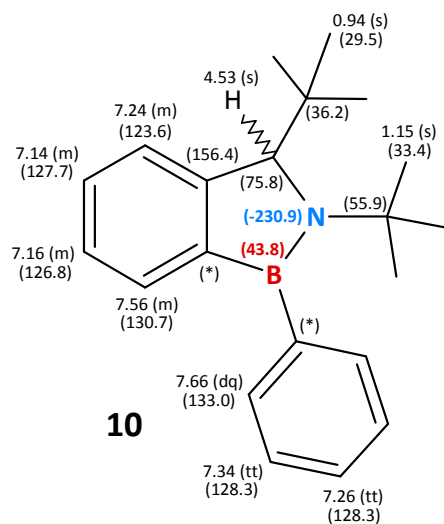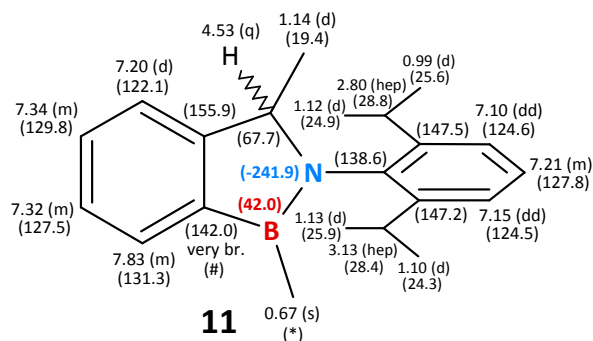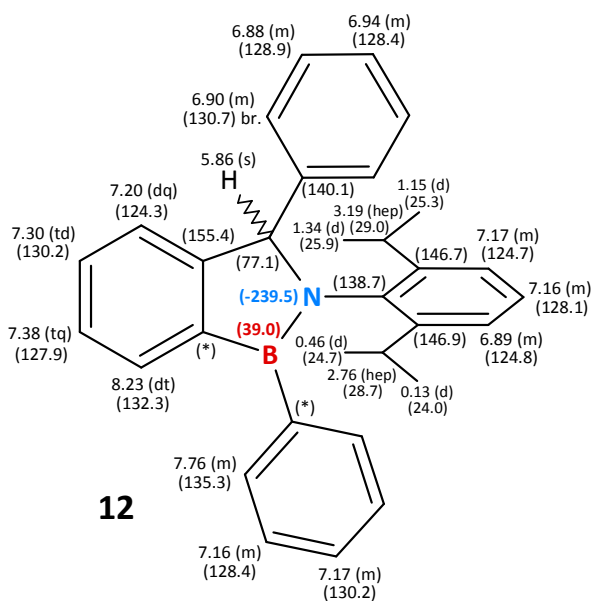

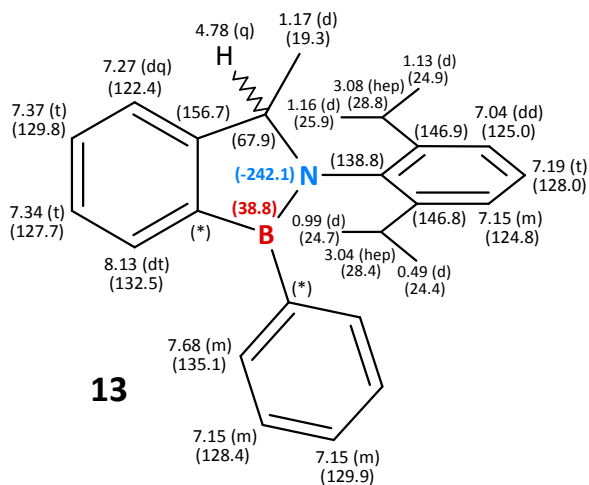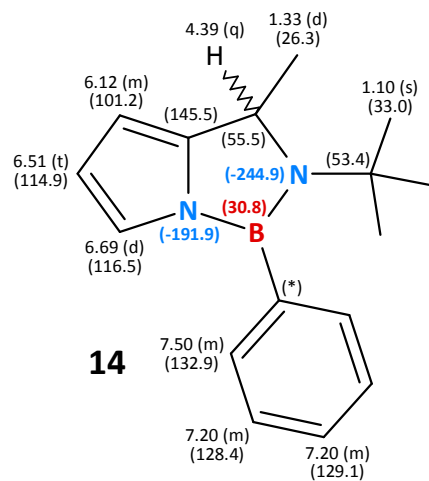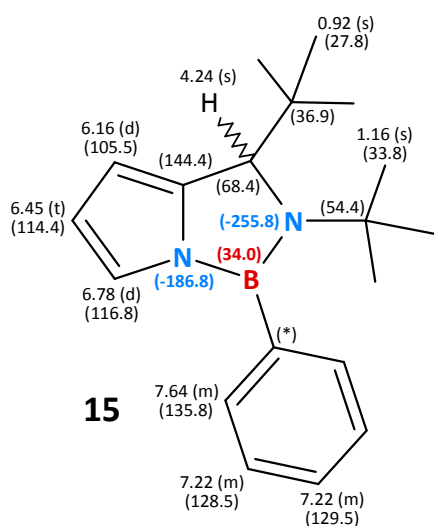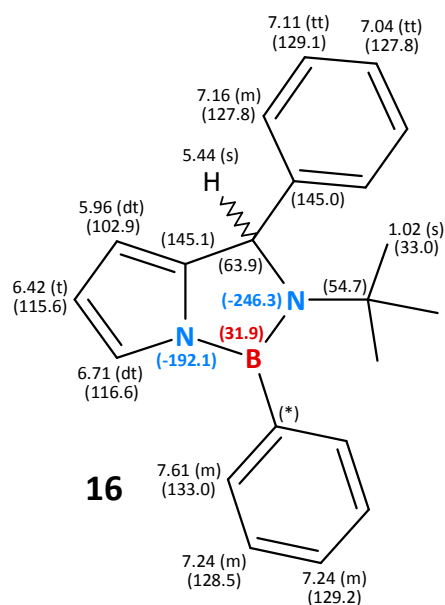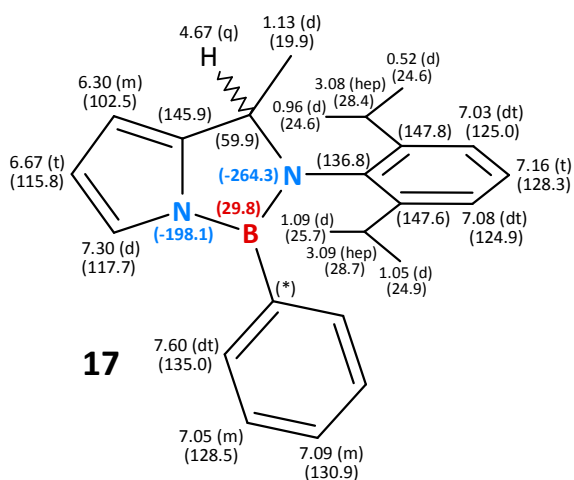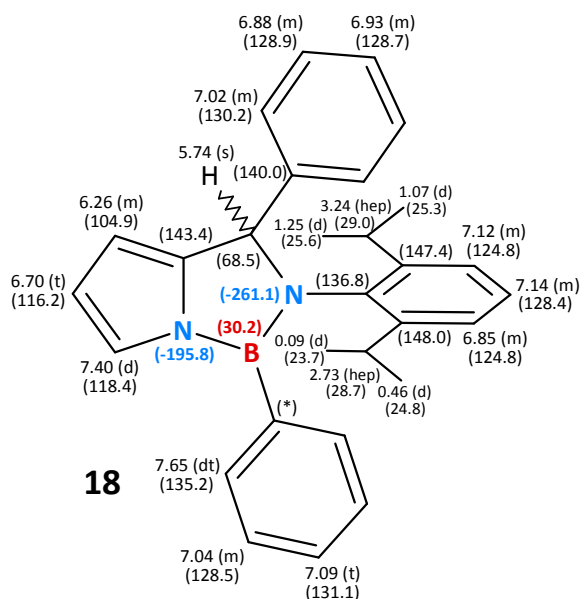

Supplement: c4dt01445f1.pdf [file c4dt01445f1.pdf]
